# Supplementary material
Source: publisher site journal article supplement (https://www.kjim.org/upload/media/kjim-2019-066-suppl2.pdf)

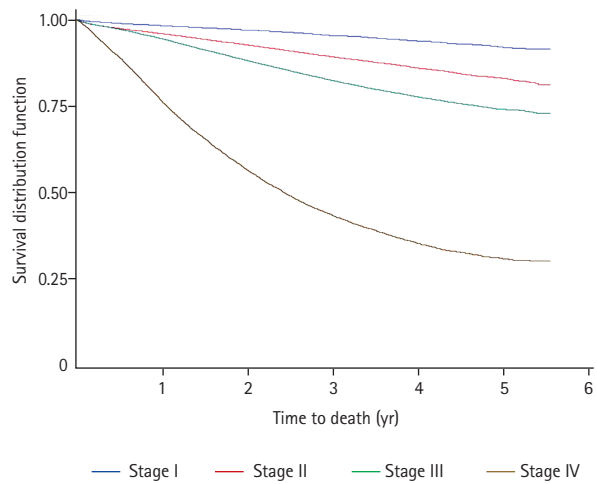

**Supplementary Figure 2.** Survival rate according to cancer stage.

Supplement: Supplementary file 1 [file kjim-2019-066-suppl2.pdf]
